# Supplementary material for: Rho kinase proteins display aberrant upregulation in vascular tumors and contribute to vascular tumor growth
Source: BMC Cancer. 2017 Jul 14;17:485. doi: 10.1186/s12885-017-3470-7 (PMC5513090; doi:10.1186/s12885-017-3470-7)
Supplement: Supplementary file 2 — Analysis of intracellular metabolite concentrates in ROCK1 and 2 knockdown SVR cells. Triplicate values for metabolite concentrations (μM) detected by H1 NMR analysis in ROCK shRNA and scrambled shRNA control SVR cells. (XLS 39 kb) [file 12885_2017_3470_MOESM2_ESM.xls]

## Sheet: Dilution Corrected Concs.
	Concentrations ( μM )
	1,3-Dihydroxyacetone	2-Oxoisocaproate	3-Hydroxybutyrate	3-Methyl-2-oxovalerate	Acetate	Alanine	Arginine	Ascorbate	Asparagine	Aspartate	Betaine	Choline	Creatine	Dimethylamine	Ethanol	Formate	Fumarate	Glucose	Glutamate	Glutamine	Glycerol	Glycine	Histidine	Hypoxanthine	Inosine	Isoleucine	Lactate	Leucine	Lysine	Malate	Methanol	Methionine	Niacinamide	O-Phosphocholine	Ornithine	Phenylalanine	Proline	Pyroglutamate	Serine	Succinate	Taurine	Threonine	Trimethylamine	Trimethylamine N-oxide	Tryptophan	Tyrosine	Uracil	Urea	Valine
Scrambled Control	82.4444	46.5556	86	29.1111	1033.78	6973	408.889	119	1395.33	2595.33	265	861.667	1389.22	37.5556	164.556	265	114.889	472.556	5184.44	1718.78	3321.89	7167.22	681.889	606.222	45	1275.44	19465.1	2213.22	2612	592.222	38	1071.89	197.444	691.111	1466.78	955.222	3335.56	353	3866.33	51.4444	8459.22	2873.33	4.44444	58.4444	216	1213.11	1795	3931.89	2487.78
Scrambled Control	77	44.4444	87.6667	25.7778	1035.44	7062.44	438.222	109	1400.89	2572	268.889	857.111	1352.22	38.4444	158.556	263.778	115.556	470.111	5208.78	1717.11	3282.11	7266	687.889	604.778	44.4444	1266	19547.6	2060.22	2596.22	567.667	43.7778	1042.56	196.111	688.889	1457.33	939.667	3338.67	336.778	3845.11	54.8889	8456	2911.22	4.22222	55.4444	217.222	1211.33	1787.56	3970	2495.33
Scrambled Control	84	48.5556	89.5556	26.7778	1040.33	7101.89	436.556	97.8889	1444.33	2642.56	283.667	863.778	1396.89	36.5556	161	262.778	114.889	471.444	5181.56	1761.22	3335.44	7235.33	688.333	615.889	44.8889	1289.56	20261.7	2145.89	2490.67	589.444	46.1111	1083.67	191.778	685.556	1534.78	970.333	3410.22	348.889	3824.56	52.6667	8512.56	2853.22	4.44444	60.8889	223.444	1231.11	1780.22	3971.78	2479.11
ROCK1 shRNA	89	43.1111	87.3333	21	920.667	11251.7	714.111	614.444	3304.56	4773.11	448.444	685.556	2942.89	17.3333	145.667	153.889	180.778	1282.33	9880.22	3599	1855.11	11284.8	1158.67	1223.22	209.556	2626.56	19575.2	4701.67	5031.33	510.778	29.1111	2126.22	260.444	1077.89	2982.89	1903.44	5260.89	393.444	6971	125.222	14562.8	4975.56	4.44444	59.3333	422.778	2276.67	2167.78	6960	4778.56
ROCK1 shRNA	98.8889	47.1111	87.6667	22.4444	924.889	11327.7	697.444	648.778	3263.89	4768.11	443.222	687.667	3038.67	17.4444	151.556	165.667	182	1261.44	9842.33	3633.89	1850.11	11501.7	1152.89	1273.78	218.222	2657.89	19749.7	4711.33	5036.56	531.444	31.1111	2136.33	268.667	1095.11	2929.33	1981.56	5284.22	396.667	7064.56	122.889	14648.4	4996.33	5.22222	68.2222	428.556	2306.33	2194.89	7060.78	4801.89
ROCK1 shRNA	88.4444	43.3333	87.5556	23.5556	901.778	11128	692.222	631.667	3271.11	4722.33	445.333	678.222	2940.67	16.4444	148	158.889	178.556	1298.33	9799	3659.78	1812.44	11342.6	1144.67	1234.56	208.444	2570.44	19458.4	4756.44	5010.67	488.667	33	2128.22	269	1079.89	2925.33	1900	5230	424.556	6989	120	14598.8	4933.33	5.55556	75.1111	435.222	2314.78	2149.11	6808.78	4713.89
ROCK2 shRNA	56.7241	33.431	78.569	17.6207	469.966	6821.62	585.103	142.414	1967.97	2952.55	211.207	502.672	1323.72	10.0172	110.431	148.69	112.121	590.414	6003.71	2411.86	1694.72	6578.19	930.155	460.552	101.017	1690.98	12610.9	3050.31	2929.74	447.155	65.0517	1309.36	169.448	623.724	1831.71	1491.97	3255.24	276.862	4794.76	93.5345	8080.9	3012.17	3.01724	64.4483	285.914	1598.53	1343.76	4052.64	3151.09
ROCK2 shRNA	55.1552	35	82.5517	21.8448	444.259	6827.78	547.569	126.362	1957.22	2979.95	215.069	505.448	1282.69	11.4655	114.052	143.862	109.466	588.966	6020.84	2347.05	1691.83	6468.72	909.517	463.207	98.2414	1703.78	12523.2	2939.16	2965.83	421.569	63.1207	1303.21	165.466	618.534	1764	1457.93	3292.9	286.638	4634.72	92.2069	7899.14	3008.91	3.01724	63.8448	289.414	1594.07	1396.02	4000.86	3146.14
ROCK2 shRNA	56.9655	35.2414	79.1724	20.2759	463.207	6834.29	569.655	115.621	1941.66	2957.86	236.672	508.224	1294.28	10.9828	115.5	143.017	109.224	589.81	5997.07	2381.21	1645	6516.88	947.172	456.448	98.3621	1692.31	12696.8	2964.74	2916.71	421.086	59.9828	1308.52	162.328	618.414	1745.05	1459.14	3233.52	294.241	4596.1	92.8103	8029.72	2932.03	2.53448	64.4483	287.845	1593.59	1371.28	3880.66	3157.48
[truncated: 1 more columns]
